# Supplementary material
Source: publisher figshare collection journal article supplement (https://geolsoc.figshare.com/ndownloader/files/8025074)
Supplement: Supplementary file 1 [file 8025074]

## Sheet: Sheet1
Sample ST rim to rim
Point	1 / 3 .	1 / 4 .	1 / 5 .	1 / 6 .	1 / 7 .	1 / 8 .	1 / 9 .	1 / 10 .	1 / 11 .	1 / 12 .	1 / 13 .	1 / 14 .	1 / 15 .	1 / 16 .	1 / 17 .	1 / 18 .	1 / 19 .	1 / 21 .	1 / 22 .	1 / 23 .	1 / 24 .	1 / 25 .	1 / 26 .	1 / 27 .	1 / 28 .	1 / 30 .	1 / 31 .	1 / 32 .	1 / 33 .	1 / 34 .	1 / 35 .	1 / 36 .	1 / 37 .	1 / 38 .	1 / 39 .	1 / 41 .	1 / 42 .	1 / 43 .	1 / 45 .	1 / 46 .	1 / 49 .	1 / 50 .	1 / 52 .	1 / 56 .	1 / 57 .	1 / 58 .	1 / 59 .	1 / 60 .	1 / 61 .
SiO2	33.91	33.941	34.27	34.781	33.791	34.313	34.296	33.828	34.103	33.589	33.325	33.864	34.311	33.658	34.158	34.236	34.614	34.283	33.711	33.038	34.353	33.519	33.946	34.646	34.269	34.372	34.422	33.742	34.158	34.457	34.015	33.675	34.097	34.627	34.032	33.944	34.302	34.145	33.974	35.941	34.455	34.324	34.677	33.697	34.236	33.578	33.94	34.253	34.301
TiO2	0.016	0	0.007	0.015	0	0.031	0	0.01	0	0	0.054	0.044	0	0.034	0	0	0	0	0.004	0	0.001	0.044	0.008	0	0.012	0.024	0	0	0.004	0.031	0.024	0.003	0	0.015	0.015	0	0	0.102	0.083	0.02	0.049	0.026	0	0	0.003	0	0.005	0	0.01
Al2O3	19.531	19.522	19.696	20.043	19.675	19.548	19.411	19.437	19.584	19.886	19.598	19.597	19.471	19.495	19.662	19.745	20.022	19.622	19.571	19.586	19.593	19.629	19.708	19.504	19.744	19.629	19.704	19.808	19.418	19.594	19.657	19.485	19.695	19.648	19.682	19.814	20.309	20.15	19.673	21.424	19.555	19.697	19.832	19.987	20.079	19.346	19.764	19.844	19.869
Cr2O3	0	0	0	0	0.028	0.015	0.007	0.053	0.02	0	0.031	0	0	0.011	0	0	0.08	0	0.04	0	0.137	0.065	0	0	0	0	0	0.012	0.031	0	0	0.05	0.004	0.026	0	0.022	0.06	0	0	0.028	0.062	0.034	0	0.007	0	0	0.007	0.041	0.083
Fe2O3	1.74107	2.78893	1.93176	2.38113	3.4401	1.857	2.20251	1.90224	2.17981	3.20786	3.22883	1.82424	2.29179	1.94438	1.60442	2.10967	1.44942	1.74896	2.45289	3.17904	1.69381	3.23963	2.49838	1.04685	1.89131	1.7692	1.36954	1.90791	1.60858	1.30895	2.34996	2.09462	1.86923	2.21909	2.27142	2.37582	2.00161	2.66035	3.40044	1.66347	1.30271	2.1227	1.81859	3.9932	1.9025	2.56731	2.6778	2.34481	1.79715
FeO	35.5464	34.5105	34.8408	35.1484	34.3266	34.6541	34.6382	34.0053	34.0306	33.4695	32.9427	33.6525	33.9938	33.4484	33.8513	33.6697	34.1588	33.7393	33.0029	32.6625	33.8469	32.411	33.1349	34.314	33.4992	33.7121	33.9937	32.9642	33.4696	33.5112	32.9535	33.0452	33.1231	33.7262	33.1742	33.2602	33.6749	33.7672	33.5513	35.7902	34.1208	34.309	34.6286	33.3409	33.9241	33.4999	33.9395	34.4421	34.3799
MnO	0.402	0.236	0.431	0.489	0.366	0.584	0.644	0.725	0.784	0.785	0.88	0.976	1.024	0.82	0.961	1.25	1.254	1.374	1.344	1.233	1.236	1.436	1.53	1.35	1.477	1.589	1.375	1.511	1.519	1.717	1.812	1.484	1.751	1.626	1.791	1.543	1.578	1.647	1.739	1.648	1.759	1.498	1.352	1.479	1.635	1.267	1.367	1.345	1.172
MgO	2.115	2.211	2.405	2.436	2.384	2.361	2.344	2.398	2.386	2.329	2.334	2.279	2.276	2.239	2.254	2.29	2.282	2.287	2.267	2.115	2.297	2.295	2.198	2.192	2.259	2.113	2.185	2.191	2.179	2.294	2.227	2.157	2.213	2.28	2.191	2.189	2.323	2.328	2.473	2.424	2.347	2.342	2.365	2.462	2.385	2.424	2.339	2.236	2.336
CaO	0.654	1.276	1.108	1.105	1.138	1.251	1.202	1.127	1.327	1.352	1.39	1.427	1.478	1.566	1.542	1.498	1.477	1.382	1.489	1.423	1.422	1.436	1.495	1.393	1.534	1.587	1.466	1.519	1.526	1.475	1.511	1.464	1.464	1.546	1.415	1.454	1.087	0.995	0.763	0.779	0.903	0.831	0.89	0.69	0.865	0.749	0.854	0.911	1.009
ZnO	0	0.293	0	0.227	0	0	0	0	0	0.017	0.137	0	0.051	0	0.029	0	0	0.017	0	0	0.071	0.366	0.09	0.061	0	0	0	0	0	0	0	0	0.061	0	0	0	0.237	0.068	0	0.244	0	0	0.125	0.205	0	0.098	0	0	0
Sum	93.9154	94.7784	94.6895	96.6256	95.1487	94.6141	94.7447	93.4856	94.4144	94.6354	93.9205	93.6638	94.8966	93.2158	94.0617	94.7984	95.3372	94.4532	93.8818	93.2365	94.6507	94.4406	94.6083	94.5069	94.6855	94.7953	94.5152	93.6552	93.9132	94.3881	94.5494	93.4579	94.2773	95.7133	94.5716	94.602	95.5725	95.8625	95.6567	99.9617	94.5535	95.1837	95.6882	95.8611	95.0296	93.5292	94.8933	95.4169	94.9571
Si	2.94316	2.92001	2.94108	2.92897	2.89488	2.94783	2.94601	2.93989	2.93538	2.88847	2.88893	2.93629	2.94216	2.93267	2.94795	2.9346	2.94652	2.94882	2.91961	2.88693	2.94932	2.89182	2.91973	2.97817	2.94	2.94894	2.95794	2.92536	2.95604	2.96281	2.92597	2.93034	2.9389	2.94311	2.92772	2.91849	2.91642	2.89998	2.89702	2.92097	2.96196	2.93601	2.94822	2.86903	2.92701	2.92337	2.91326	2.92478	2.93635
Ti	0.00104431	0	0.000451764	0.000949915	0	0.00200275	0	0.000653546	0	0	0.00352032	0.00286902	0	0.00222779	0	0	0	0	0.000260516	0	6.45621e-05	0.00285466	0.000517445	0	0.00077419	0.00154844	0	0	0.000260315	0.00200452	0.0015525	0.000196314	0	0.000958746	0.000970407	0	0	0.00651463	0.00532235	0.00122233	0.0031677	0.00167245	0	0	0.000192878	0	0.000322744	0	0.000643757
Al	1.99787	1.97942	1.99217	1.98926	1.98656	1.97926	1.96514	1.99086	1.98669	2.01546	2.00233	2.00265	1.96778	2.00195	1.99991	1.99471	2.00873	1.98915	1.99766	2.01709	1.9825	1.99588	1.9978	1.97595	1.99635	1.98479	1.99555	2.02398	1.98052	1.98566	1.99284	1.99833	2.00069	1.96818	1.99557	2.00781	2.03505	2.01697	1.97711	2.05208	1.98126	1.98571	1.9872	2.00561	2.0232	1.98507	1.99939	1.99701	2.00462
Cr	0	0	0	0	0.00189655	0.00101885	0.000475405	0.00364172	0.00136106	0	0.00212473	0	0	0.00075778	0	0	0.00538422	0	0.00273898	0	0.00929936	0.00443373	0	0	0	0	0	0.000822556	0.00212107	0	0	0.00343998	0.000272586	0.00174719	0	0.00149552	0.00403327	0	0	0.00179916	0.004214	0.00229939	0	0.000471213	0	0	0.000475052	0.00276792	0.00561765
Fe3+	0.113716	0.180557	0.124757	0.150895	0.221779	0.120054	0.142373	0.124405	0.141192	0.20759	0.210635	0.119031	0.147886	0.127489	0.104199	0.136081	0.0928473	0.113205	0.159863	0.209044	0.109431	0.210326	0.161707	0.0677174	0.122103	0.114224	0.0885619	0.124476	0.104756	0.0846968	0.152117	0.137162	0.121241	0.141934	0.147048	0.153719	0.128065	0.17003	0.218202	0.101735	0.0842741	0.136636	0.116351	0.255849	0.122401	0.1682	0.172967	0.150668	0.115772
Fe2+	2.58018	2.48301	2.50063	2.47541	2.4594	2.48981	2.48836	2.47156	2.44968	2.40707	2.38833	2.44032	2.43782	2.43736	2.44327	2.41365	2.4318	2.42702	2.39041	2.38693	2.43021	2.33852	2.38346	2.46681	2.40352	2.41888	2.44298	2.39012	2.42235	2.40982	2.37066	2.40485	2.38763	2.39733	2.38677	2.3916	2.39445	2.39846	2.39266	2.43259	2.4531	2.45434	2.46219	2.37405	2.42559	2.43916	2.43636	2.45953	2.46135
Mn	0.0295528	0.0171972	0.0313297	0.0348793	0.0265581	0.0424955	0.0468556	0.0533678	0.0571576	0.0571777	0.0646154	0.0716797	0.0743737	0.0605166	0.0702483	0.0907533	0.0904151	0.100102	0.0985911	0.0912582	0.0898796	0.104935	0.111463	0.0982914	0.107328	0.115471	0.100079	0.110958	0.111343	0.12505	0.132021	0.109378	0.127832	0.117057	0.130504	0.112369	0.113638	0.118481	0.1256	0.113444	0.128079	0.108532	0.0973602	0.106659	0.118398	0.0934309	0.0993852	0.0972753	0.0849795
Mg	0.273656	0.283567	0.307692	0.305815	0.30447	0.302377	0.300162	0.31068	0.306162	0.298572	0.301632	0.294587	0.290947	0.290829	0.289994	0.292624	0.289589	0.293254	0.292693	0.275513	0.293986	0.29517	0.281832	0.280896	0.288915	0.270252	0.279907	0.283178	0.281115	0.294055	0.28558	0.279814	0.284353	0.288892	0.280991	0.280575	0.294435	0.294754	0.314367	0.293683	0.30078	0.298645	0.29975	0.312493	0.303975	0.314608	0.2993	0.284626	0.298114
Ca	0.0608188	0.11762	0.101884	0.099703	0.104459	0.115153	0.110629	0.104943	0.122382	0.124572	0.129109	0.132574	0.135794	0.146198	0.142588	0.137579	0.134714	0.127365	0.138172	0.13323	0.130807	0.132742	0.137774	0.128298	0.141008	0.145885	0.134977	0.141104	0.141497	0.135891	0.139263	0.136497	0.135202	0.140791	0.130428	0.133947	0.0990225	0.0905451	0.0697112	0.067834	0.0831741	0.0761611	0.0810741	0.0629457	0.0792374	0.0698688	0.0785414	0.0833462	0.0925476
Zn	0	0.0186226	0	0.0141225	0	0	0	0	0	0.00108002	0.00877408	0	0.00323085	0	0.00184901	0	0	0.00108027	0	0	0.00450328	0.0233279	0.00571886	0.00387382	0	0	0	0	0	0	0	0	0.00388429	0	0	0	0.0148865	0.00426669	0	0.0146501	0	0	0.00785131	0.0128947	0	0.0063033	0	0	0
Sum	8	8	8	8	8	8	8	8	8	8	8	8	8	8	8	8	8	8	8	8	8	8	8	8	8	8	8	8	8	8	8	8	8	8	8	8	8	8	8	8	8	8	8	8	8	8	8	8	8
XMg	0.0958907	0.102498	0.109565	0.109957	0.110161	0.108294	0.107642	0.111665	0.111096	0.110352	0.112132	0.107714	0.106622	0.106602	0.106098	0.108128	0.106412	0.107803	0.109088	0.103481	0.107917	0.112075	0.105741	0.102229	0.107306	0.100498	0.102798	0.105928	0.103983	0.108753	0.107513	0.104227	0.10642	0.107546	0.105329	0.104999	0.109501	0.109444	0.11613	0.107723	0.109221	0.10848	0.108529	0.116318	0.111364	0.114246	0.109407	0.103721	0.108033
Xpy	0.0929474	0.0977349	0.104603	0.104882	0.105175	0.102506	0.101888	0.105654	0.104301	0.103405	0.104599	0.100228	0.0989975	0.0990934	0.0984334	0.0997151	0.0982816	0.0994844	0.100242	0.0954344	0.0998294	0.102798	0.0966989	0.0944411	0.0982447	0.0915957	0.0946289	0.0968011	0.0950901	0.0991815	0.0975501	0.0954821	0.0968831	0.0981267	0.0959444	0.0961372	0.101475	0.101561	0.108315	0.101007	0.101439	0.10166	0.101943	0.109411	0.103845	0.107851	0.102726	0.0973154	0.101503
Xalm	0.876358	0.855799	0.85011	0.848962	0.849567	0.844051	0.844655	0.840509	0.834536	0.833649	0.828221	0.830278	0.829491	0.830474	0.829323	0.822478	0.825313	0.823349	0.818671	0.826806	0.825232	0.814427	0.817786	0.829376	0.81731	0.819824	0.825905	0.817034	0.819384	0.812806	0.809783	0.820617	0.813498	0.814291	0.81496	0.819464	0.825233	0.826417	0.824391	0.836646	0.827315	0.83547	0.837373	0.831207	0.828638	0.836168	0.836206	0.840929	0.838052
XGrs	0.0206571	0.0405393	0.0346363	0.034194	0.036084	0.039037	0.0375521	0.0356882	0.0416919	0.0431435	0.0447721	0.045106	0.0462052	0.0498135	0.0483991	0.0468815	0.0457195	0.0432077	0.0473214	0.0461492	0.0444183	0.0462296	0.0472715	0.0431356	0.0479493	0.0494444	0.0456322	0.0482348	0.0478627	0.0458347	0.0475704	0.0465776	0.0460651	0.0478218	0.0445347	0.045896	0.0341275	0.0311984	0.0240189	0.0233303	0.0280507	0.0259256	0.0275727	0.0220387	0.0270693	0.0239517	0.026957	0.0284966	0.031511
XSps	0.0100376	0.00592721	0.0106508	0.0119621	0.00917415	0.0144061	0.0159048	0.0181489	0.0194719	0.0198025	0.0224072	0.0243878	0.0253063	0.0206197	0.0238445	0.0309252	0.0306854	0.0339588	0.0337656	0.0316108	0.0305206	0.0365454	0.0382439	0.0330469	0.0364964	0.039136	0.0338339	0.0379297	0.0376628	0.0421779	0.0450965	0.0373235	0.0435542	0.0397603	0.0445605	0.0385025	0.0391647	0.040824	0.0432754	0.0390169	0.0431952	0.0369447	0.0331115	0.0373437	0.0404475	0.0320291	0.034111	0.033259	0.0289342
[truncated: 25 more columns]
